# Supplementary material
Source: PubMed Central journal article supplement (PMC10751105)
Supplement: NIHMS1949015-supplement-1.pdf [file NIHMS1949015-supplement-1.pdf]

## Supplementary Data

### Detection of SARS-CoV-2 neutralizing antibodies by blockade of ACE-2 binding (BoAb) assay.

Neutralizing activity is measured by inhibition of interaction between SARS-CoV-2 spike conjugated bead and biotinylated ACE-2 by the presence of neutralizing antibody. The ACE-2 binding signal is amplified by streptavidin-beta-galactosidase and a fluorescent RGB-substrate which is readout as average enzymes per bead (AEB) using single molecule array (SIMOA) technology on the Quanterix HD-X platform. AEB signal and neutralizing activity are inversely correlated; 100% AEB signal is generated if 0% neutralizing activity is present, and 0% AEB signal is generated if 100% neutralizing activity is present. Half maximal AEB signal (50%) corresponds to 50% neutralizing activity, which is also the  $IC_{50}$  (50% inhibitory concentration) titer. For the two-point dilution approach, patient samples were tested at two dilutions (1:50 and 1:200), and their AEB signal was compared to the 50% maximal AEB signal generated by dilution series of monoclonal SARS-CoV-2 neutralizing antibody. The two dilutions were selected based on previous observation that  $IC_{50}$  titer for COVID-19 vaccinated patient samples measured by the BoAb assay clustered into three groups separated approximately at 1:50 and 1:200 dilution. Thus, neutralizing activity was binned into three groups as follows: “strong” if the 1:200 dilution showed greater than 50% neutralizing activity, “average” if the 1:200 dilution showed less than 50% neutralizing activity but the 1:50 dilution showed greater than 50% neutralizing activity, and “weak” if the 1:50 dilution showed less than 50% neutralizing activity.

## Supplemental Figure S1

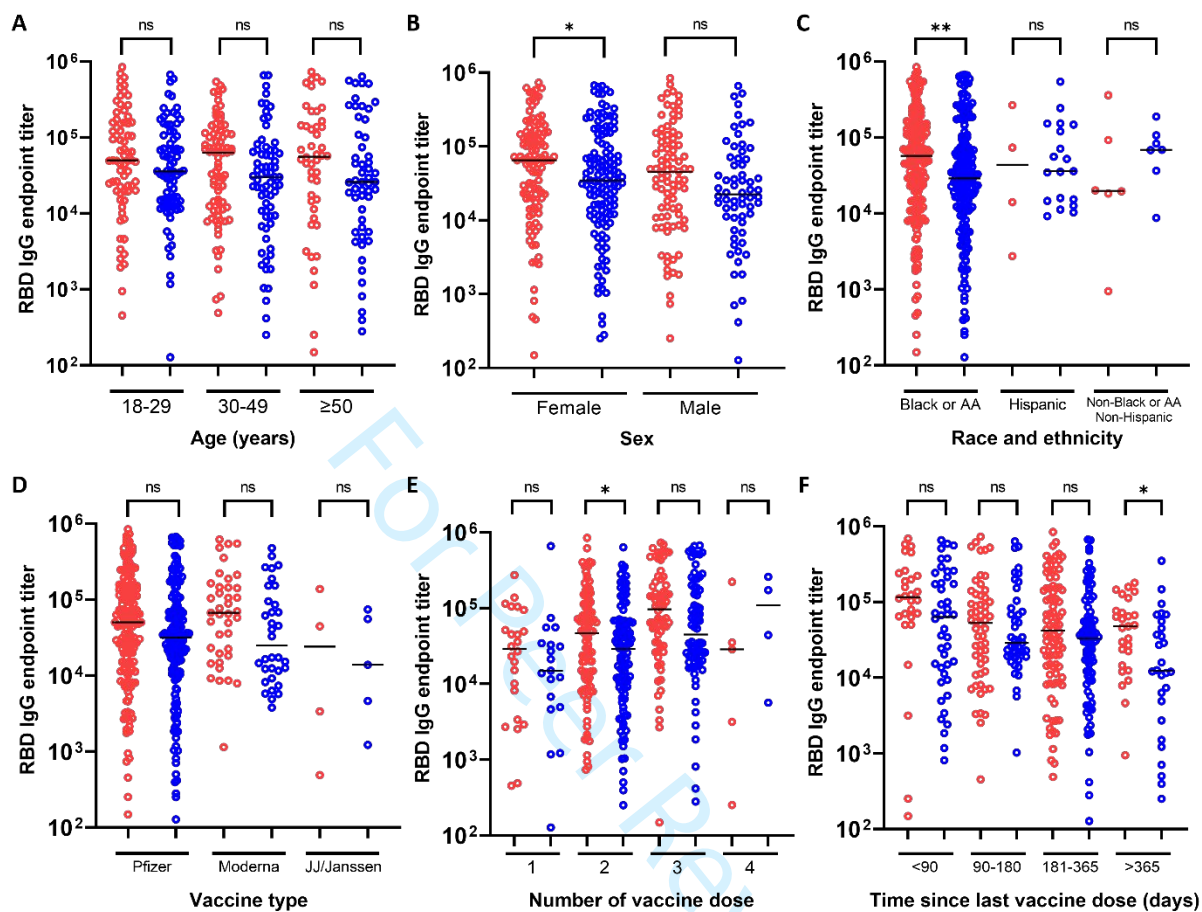

**Supplemental Figure S1.** Subgroup comparison of COVID-19 vaccine immune response in SCD (red) and matched non-SCD controls (blue) using SARS-CoV-2 RBD-specific IgG endpoint titer. Lines indicate median. Comparison by (A) age, (B) sex, (C) race and ethnicity, (D) COVID-19 vaccine type, (E) number of vaccine dose, and (F) time since last vaccine dose. Statistical difference measured by Mann-Whitney test. \* =  $P \leq 0.05$ , \*\* =  $P \leq 0.005$ , ns =  $P > 0.05$ . AA, African American; RBD, receptor binding domain; SCD, sickle cell disease.

**Supplemental Table S1.** Analysis of P-values from subgroup comparison of RBD vaccine response in SCD vs controls

|                                                | <b>P values</b> | <b>q value, FDR = 5%</b> | <b>Discovery</b> |
|------------------------------------------------|-----------------|--------------------------|------------------|
| <b>Age, years</b>                              |                 |                          |                  |
| 18-29                                          | 0.2157          | 0.3436                   | No               |
| 30-49                                          | 0.0563          | 0.1512                   | No               |
| ≥50                                            | 0.1641          | 0.2976                   | No               |
| <b>Sex</b>                                     |                 |                          |                  |
| Female                                         | 0.0478*         | 0.1512                   | No               |
| Male                                           | 0.0682          | 0.1512                   | No               |
| <b>Race and Ethnicity</b>                      |                 |                          |                  |
| Black or African American                      | 0.004**         | 0.0798                   | No               |
| Hispanic                                       | 0.8449          | 0.9364                   | No               |
| Non-Black or African American,<br>Non-Hispanic | 0.4452          | 0.5551                   | No               |
| <b>Vaccine Type</b>                            |                 |                          |                  |
| Pfizer-BioNTech                                | 0.0585          | 0.1512                   | No               |
| Moderna                                        | 0.0591          | 0.1512                   | No               |
| Janssen (Johnson & Johnson)                    | 0.9048          | 0.9500                   | No               |
| <b>Number of vaccine dose</b>                  |                 |                          |                  |
| 1                                              | 0.3892          | 0.5176                   | No               |
| 2                                              | 0.0408*         | 0.1512                   | No               |
| 3                                              | 0.0629          | 0.1512                   | No               |
| 4                                              | 0.2857          | 0.4071                   | No               |
| <b>Time since last vaccine dose, days</b>      |                 |                          |                  |
| <90                                            | 0.0953          | 0.1901                   | No               |
| 90-180                                         | 0.681           | 0.7992                   | No               |
| 181-365                                        | 0.2239          | 0.3436                   | No               |
| >365                                           | 0.0198*         | 0.1512                   | No               |

\* =  $P \leq 0.05$

\*\* =  $P \leq 0.005$

FDR, false discovery rate

**Supplemental Table S2.** Descriptive Statistics of SCD Study Cohort Characteristics

| <b>Hemoglobin genotype</b>                | <b>n = 201</b>                           |
|-------------------------------------------|------------------------------------------|
| SS                                        | 75.6% (n = 152)                          |
| SC                                        | 17.4% (n = 35)                           |
| S/ $\beta^+$ -thalassemia                 | 4.5% (n = 9)                             |
| S/ $\beta^0$ -thalassemia                 | 2.5% (n = 5)                             |
| <b>RBC transfusion burden<sup>a</sup></b> |                                          |
| Minimal                                   | 35.3% (n = 71)                           |
| Episodic                                  | 48.8% (n = 98)                           |
| Chronic                                   | 15.9% (n = 32)                           |
| <b>Hydroxyurea at time of vaccination</b> |                                          |
| Yes                                       | 53.7% (n = 108)                          |
| No                                        | 46.3% (n = 93)                           |
| <b>Total Surgical Splenectomy</b>         |                                          |
| Yes                                       | 11.9% (n = 24)                           |
| No                                        | 88.1% (n = 177)                          |
| <b>Historic RBC alloantibody, n (%)</b>   | <b>Total Records Available (n = 146)</b> |
| No alloantibody                           | 74.0% (n = 108)                          |
| 1 alloantibody                            | 8.2% (n = 12)                            |
| 2 alloantibody                            | 6.2% (n = 9)                             |
| 3 or more alloantibody                    | 11.6% (n = 17)                           |

<sup>a</sup>See Materials and Methods for RBC transfusion burden categories

## Supplemental Figure S2

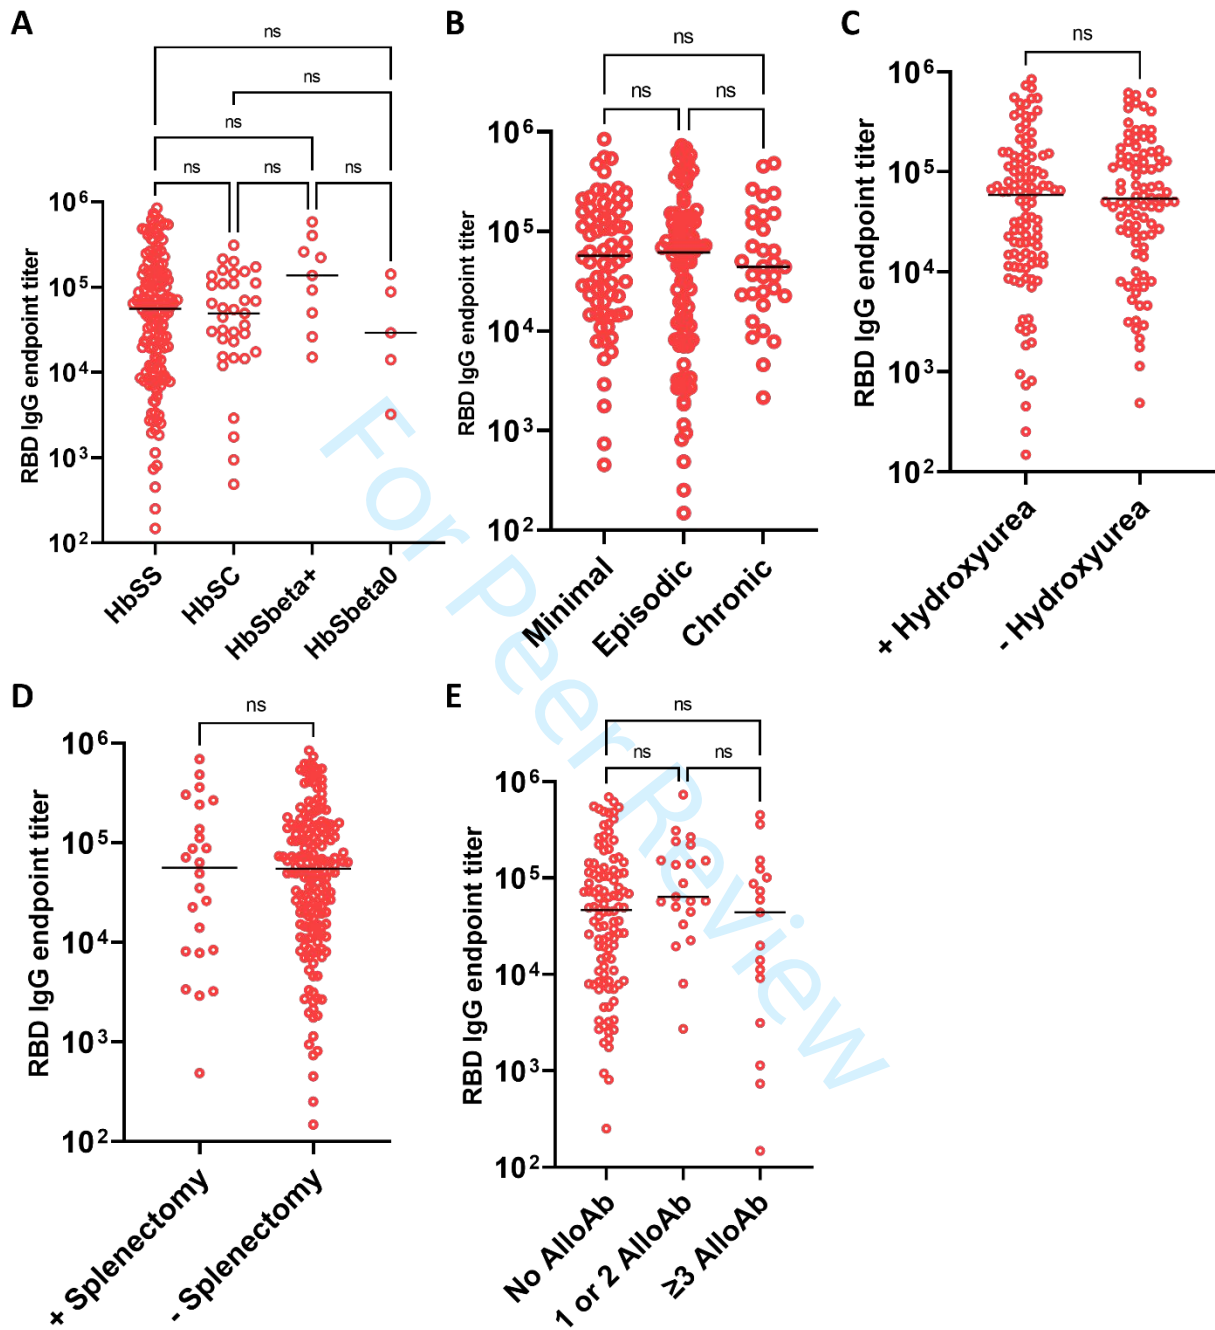

**Supplemental Figure S2.** Subgroup comparison of COVID-19 vaccine immune response within SCD cohort using SARS-CoV-2 RBD-specific IgG endpoint titer. Lines indicate median. Comparison by (A) sickle genotype, (B) RBC transfusion burden, (C) hydroxyurea at time of first vaccine dose, (D) history of total surgical splenectomy, and (E) number of RBC alloantibodies. Statistical difference measured by Mann-Whitney test for pairwise comparisons and Kruskal-

1  
2  
3 Wallis test followed by Dunn's test for multiple comparisons. ns =  $P > 0.05$ . RBD, receptor  
4 binding domain.  
5  
6  
7  
8  
9  
10  
11  
12  
13  
14  
15  
16  
17  
18  
19  
20  
21  
22  
23  
24  
25  
26  
27  
28  
29  
30  
31  
32  
33  
34  
35  
36  
37  
38  
39  
40  
41  
42  
43  
44  
45  
46  
47  
48  
49  
50  
51  
52  
53  
54  
55  
56  
57  
58  
59  
60

For Peer Review
